# Supplementary material for: Distribution of Antibiotic Resistance Genes and Their Association with Microbes in Wastewater Treatment Plants: A Metagenomics Analysis
Source: MDPI journal article supplement (doi:10.3390/w15081587), 2023-04-19
Supplement: s1 [file s1]

Archive with 1 entries (1 files):
- water-2287756-supplementary.pdf
