# Supplementary figures and images for: Distribution of Antibiotic Resistance Genes and Their Association with Microbes in Wastewater Treatment Plants: A Metagenomics Analysis
Source: MDPI journal article supplement (doi:10.3390/w15081587), 2023-04-19

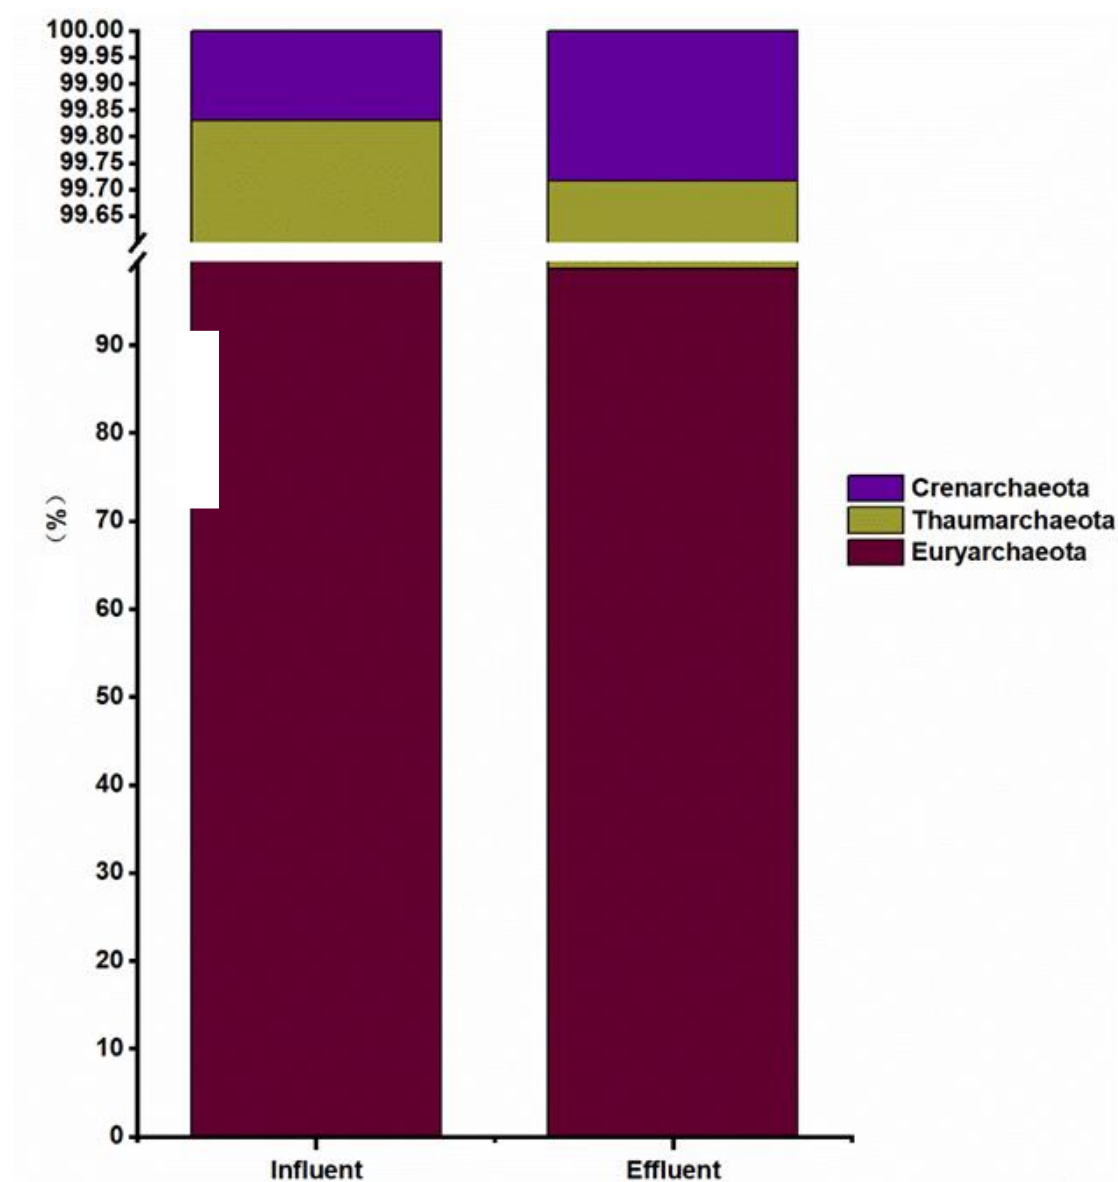

Figure S1. The top 3 abundant archaeal phyla in influent and effluent, visualized by Origin 2022.

Supplement: s1 [file s1 › water-2287756-supplementary.pdf]
